# Supplementary material
Source: PubMed Central journal article supplement (PMC5082975)
Supplement: NIHMS824335-supplement-Supplement.pdf [file NIHMS824335-supplement-Supplement.pdf]

## Supplementary Online Content

Nordsletten AE, Larsson H, Crowley JJ, Almqvist C, Lichtenstein P, Mataix-Cols D. Patterns of nonrandom mating within and across 11 major psychiatric disorders. *JAMA Psychiatry*. Published online February 24, 2016. doi:10.1001/jamapsychiatry.2015.3192.

### **eMaterial.**

**eTable.** Proportion of Non-Psychiatric Case Probands Mated, by Diagnosis and Gender

**eFigure 1.** Plot of Odds Ratios Using ADHD Proband Populations, By Proband Gender, Restricted Case Samples

**eFigure 2.** Plot of Odds Ratios Using ASD Proband Populations, By Proband Gender, Restricted Case Samples

**eFigure 3.** Plot of Odds Ratios Using SCZ Proband Populations, By Proband Gender, Restricted Case Samples

**eFigure 4.** Plot of Odds Ratios Using BIP Proband Populations, By Proband Gender, Restricted Case Samples

**eFigure 5.** Plot of Odds Ratios Using DEP Proband Populations, By Proband Gender, Restricted Case Samples

**eFigure 6.** Plot of Odds Ratios Using GAD Proband Populations, By Proband Gender, Restricted Case Samples

**eFigure 7.** Plot of Odds Ratios Using AGO Proband Populations, By Proband Gender, Restricted Case Samples

**eFigure 8.** Plot of Odds Ratios Using SOC Proband Populations, By Proband Gender, Restricted Case Samples

**eFigure 9.** Plot of Odds Ratios Using OCD Proband Populations, By Proband Gender, Restricted Case Samples

**eFigure 10.** Plot of Odds Ratios Using SUB Proband Populations, By Proband Gender, Restricted Case Samples

**eFigure 11.** Plot of Odds Ratios Using ANO Proband Populations, By Proband Gender, Restricted Case Samples

**eFigure 12.** Dotplot of Odds Ratios Using Somatic Proband Populations<sup>1</sup>, By Proband Gender, Restricted Case Samples

This supplementary material has been provided by the authors to give readers additional information about their work.

© 2016 American Medical Association. All rights reserved.

## eMaterial

### ICD Codes

#### *Psychiatric Conditions*

Schizophrenia (SCZ)<sup>1</sup>(≥ 2 Dx coded any of the following: 295 [ICD-8 & 9]; F20, F23; F23.2; F25 [ICD-10])<sup>1</sup>, Bipolar Disorder (BIP) (≥ 2 Dx coded any of the following: 296, except 296.2 [ICD-8 & ICD-9]; F30 and F31 [ICD-10])<sup>1</sup>, Autism (ASD) (any Dx coded 299 [ICD-9]; F84.0, F84.1, F84.5 & F84.9 [ICD-10])<sup>1</sup>, Anorexia Nervosa (ANO) (any Dx coded 307.1 [ICD-9]; F50.0 [ICD-10])<sup>1</sup>, Substance Abuse (SUB) (any Dx coded 303 & 304 [ICD-8]; 303, 304, 305.1 & 305.9 [ICD-9]; F10-F19, except subsection 0.5 [ICD-10])<sup>1</sup>, Attention Deficit Hyperactivity Disorder (ADHD) (any Dx using codes 314 [ICD-9]; F90 [ICD-10])<sup>2</sup>, OCD (any Dx coded F42 [ICD-10])<sup>3</sup>, Major Depressive Disorder (MDD) (any Dx coded 296.0, 296.2 & 298 [ICD-8]; 296.2, 296.3, & 298.0 [ICD-9]; F32 & F33 [ICD-10])<sup>1</sup>, Tic Disorder (TIC) (any Dx coded 306.2 [ICD-8]; 307C [ICD-9]; F95.1, F95.2 provided F95.0 is not dx in the same year, F95.8 & F95.9, provided another tic dx is registered and F95.0 is not dx within the year, or at least two dx of F95.0 over a period longer than one year [ICD-10]), Social Phobia (SOC) (any Dx coded F40.1 [ICD-10]), Agoraphobia (AGO) (any Dx coded F40.0 [ICD-10]),<sup>4</sup> and Generalized Anxiety Disorder (GAD) (any Dx coded F41.1 [ICD-10]).<sup>4</sup>

#### *Non-Psychiatric Conditions*

Rheumatoid Arthritis (after age 16, any Dx coded 712.38, 712.39 [ICD-8]; 714A-C, 714W [ICD-9], M05-6 [ICD-10]),<sup>5,6</sup> Multiple Sclerosis (any Dx coded 340.99 [ICD-8]; 340 [ICD-9], G359 [ICD-10]),<sup>7</sup> Chron's Disease (any Dx coded 563 [ICD-8], 555A-C, X [ICD-9], K50 [ICD-10]),<sup>8,9</sup> Diabetes Type I (any Dx coded E10 [ICD-10]), Diabetes Type II (any Dx coded E11 [ICD-10]).

1. Power RA, Kyaga S, Uher R, et al. Fecundity of patients with schizophrenia, autism, bipolar disorder, depression, anorexia nervosa, or substance abuse vs their unaffected siblings. *JAMA psychiatry* 2013;70(1):22-30. doi:10.1001/jamapsychiatry.2013.268.
2. Larsson H, Rydén E, Boman M, Långström N, Lichtenstein P, Landén M. Risk of bipolar disorder and schizophrenia in relatives of people with attention-deficit hyperactivity disorder. *Br. J. Psychiatry* 2013;203(2):103-6. doi:10.1192/bjp.bp.112.120808.
3. Mataix-Cols D, Boman M, Monzani B, et al. Population-based, multigenerational family clustering study of obsessive-compulsive disorder. *JAMA psychiatry* 2013;70:709-17. doi:10.1001/jamapsychiatry.2013.3.
4. Li X, Sundquist J, Sundquist K. Sibling risk of anxiety disorders based on hospitalizations in Sweden. *Psychiatry Clin. Neurosci.* 2011;65:233-238. doi:10.1111/j.1440-1819.2011.02199.x.
5. Askling J, Fored CM, Brandt L, et al. Risk and case characteristics of tuberculosis in rheumatoid arthritis associated with tumor necrosis factor antagonists in Sweden. *Arthritis Rheum.* 2005;52(7):1986-92. doi:10.1002/art.21137.

6. Baecklund E, Iliadou A, Askling J, et al. Association of chronic inflammation, not its treatment, with increased lymphoma risk in rheumatoid arthritis. *Arthritis Rheum.* 2006;54(3):692-701. doi:10.1002/art.21675.
7. Ahlgren C, Odén A, Lycke J. High nationwide prevalence of multiple sclerosis in Sweden. *Mult. Scler.* 2011;17(8):901-8. doi:10.1177/1352458511403794.
8. Andersson RE, Olaison G, Tysk C, Ekbom A. Appendectomy is followed by increased risk of Crohn's disease. *Gastroenterology* 2003;124(1):40-6. doi:10.1053/gast.2003.50021.
9. Eriksson L, Haglund B, Od lind V, Altman M, Kieler H. Prenatal inflammatory risk factors for development of bronchopulmonary dysplasia. *Pediatr. Pulmonol.* 2014;49(7):665-72. doi:10.1002/ppul.22881.

**eTable. Proportion of Non-Psychiatric Case Probands Mated, by Diagnosis and Gender.**

| Proband Dx <sup>1</sup> | Male Somatic Case Proband |              |      | Female Somatic Case Proband |              |      |
|-------------------------|---------------------------|--------------|------|-----------------------------|--------------|------|
|                         | Total N                   | Mated Subset |      | Total N                     | Mated Subset |      |
|                         |                           | N            | %    |                             | N            | %    |
| Crohn's Disease         | 12731                     | 9594         | 73.4 | 14422                       | 11908        | 82.6 |
| DM Type I               | 117309                    | 90977        | 77.6 | 95425                       | 78947        | 82.7 |
| DM Type II              | 253894                    | 227242       | 89.5 | 214163                      | 192573       | 89.9 |
| Multiple Sclerosis      | 8663                      | 6706         | 77.4 | 17160                       | 14109        | 82.2 |
| Rheumatoid Arthritis    | 39127                     | 33732        | 86.2 | 97991                       | 83042        | 84.7 |

<sup>1</sup> **DM Type I** = Diabetes Mellitus Type I, **DM Type II** = Diabetes Mellitus Type II

**Figure 1. Odds ratios for psychiatric disorders in spouses of ADHD probands, restricted case samples**

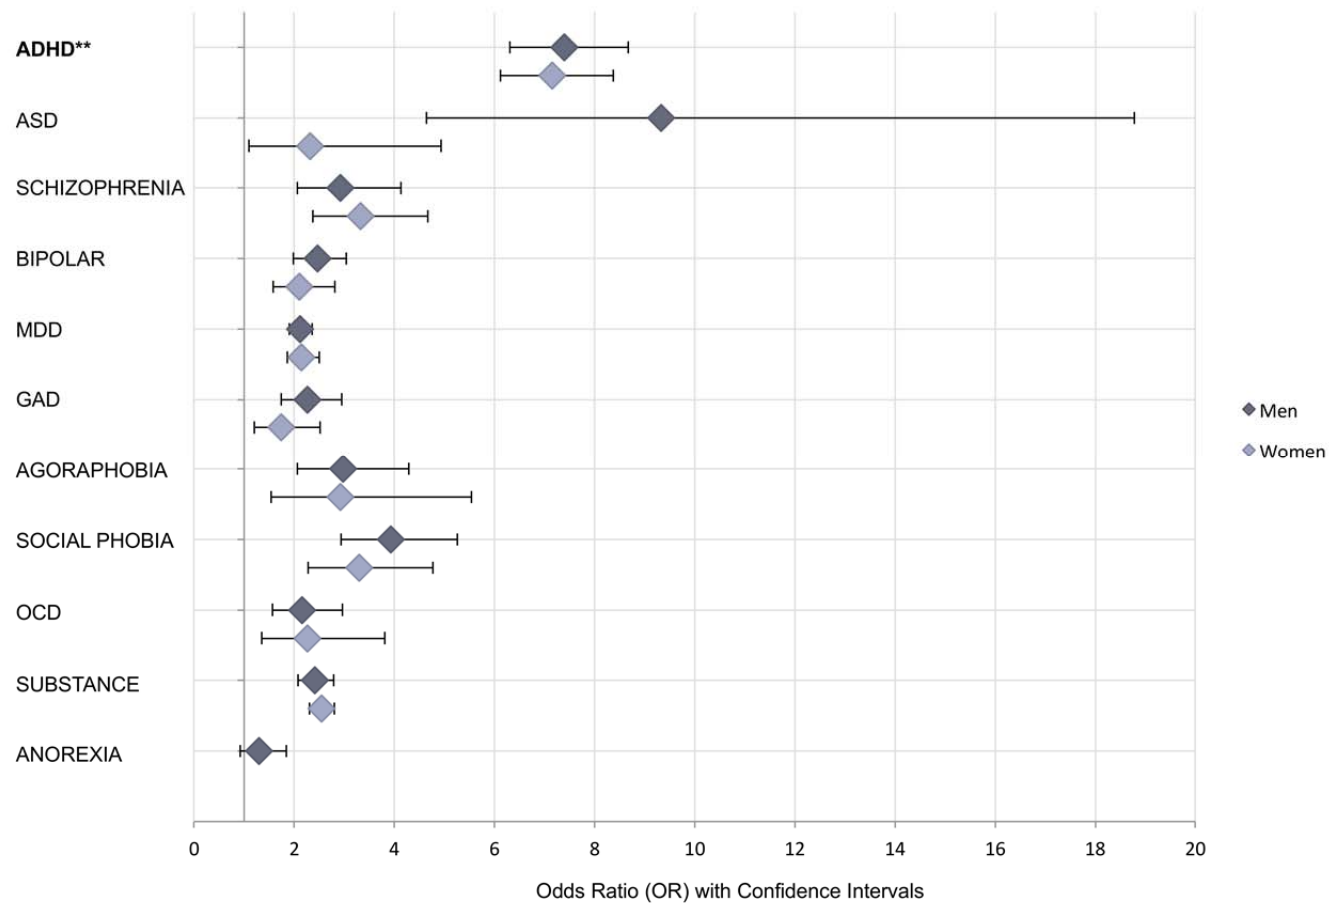

\*\* ADHD is the diagnosis of the case indexes, whose gender is reflected in the color of the markers; the value of the markers indicates the risk of that row's diagnosis in the opposite sex mate of the ADHD index (e.g., the odds of Autism in the partners of males with ADHD, relative to their matched controls, is  $\approx 9.3$ ; the odds of Autism in the partners of females with ADHD, relative to their matched controls, is  $\approx 2.3$ )

**Figure 2. Odds ratios for psychiatric disorders in spouses of ASD probands, restricted case samples**

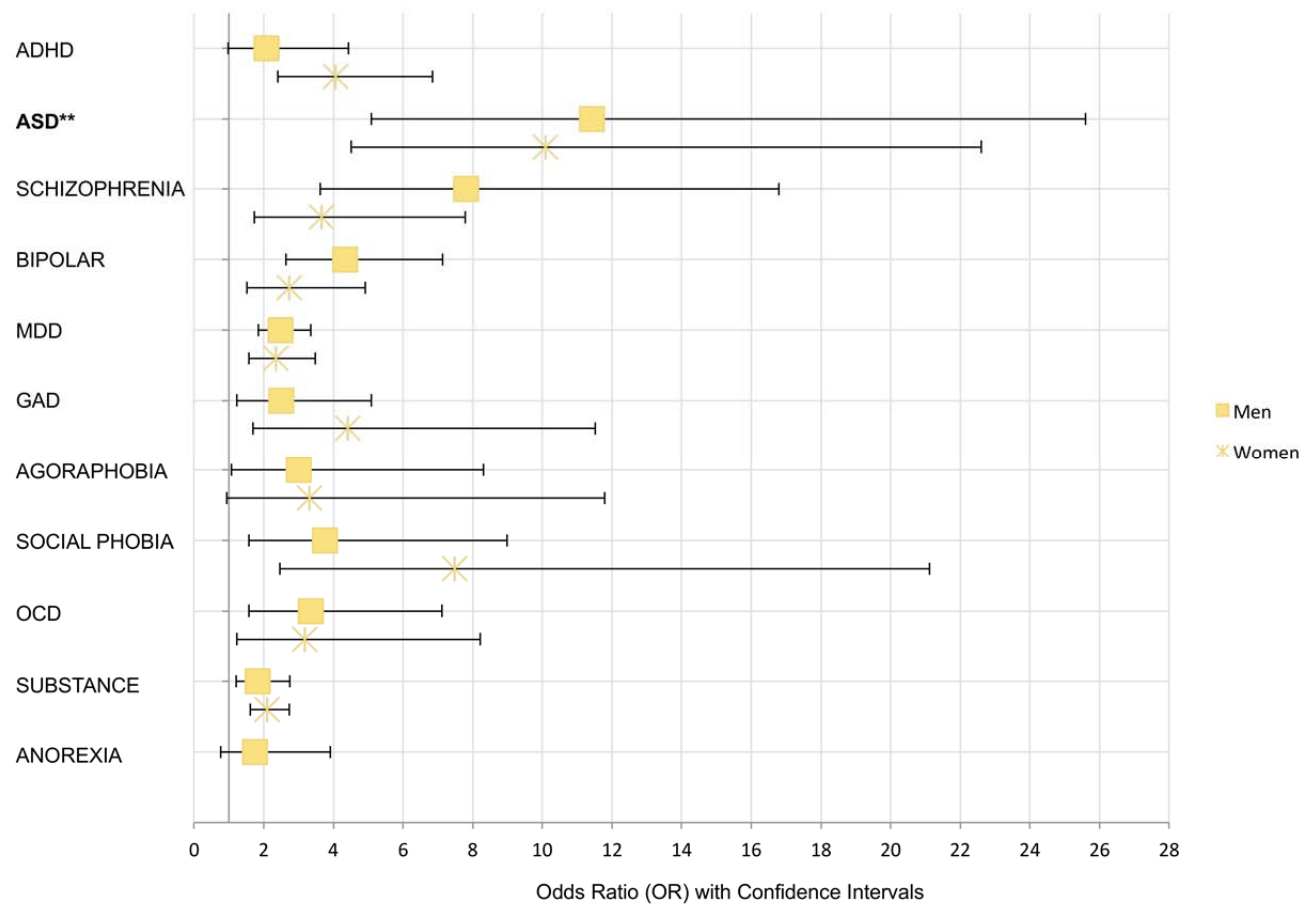

\*\* ASD is the diagnosis of the case indexes, whose gender is reflected in the color of the markers; the value of the markers indicates the risk of that row's diagnosis in the opposite sex mate of the ASD index (e.g., the odds of ADHD in the partners of males with ASD, relative to their matched controls, is  $\approx 2.1$ ; the odds of ADHD in the partners of females with Autism, relative to their matched controls, is  $\approx 4.1$ )

**eFigure 3. Odds ratios for psychiatric disorders in spouses of SCZ probands, restricted case samples**

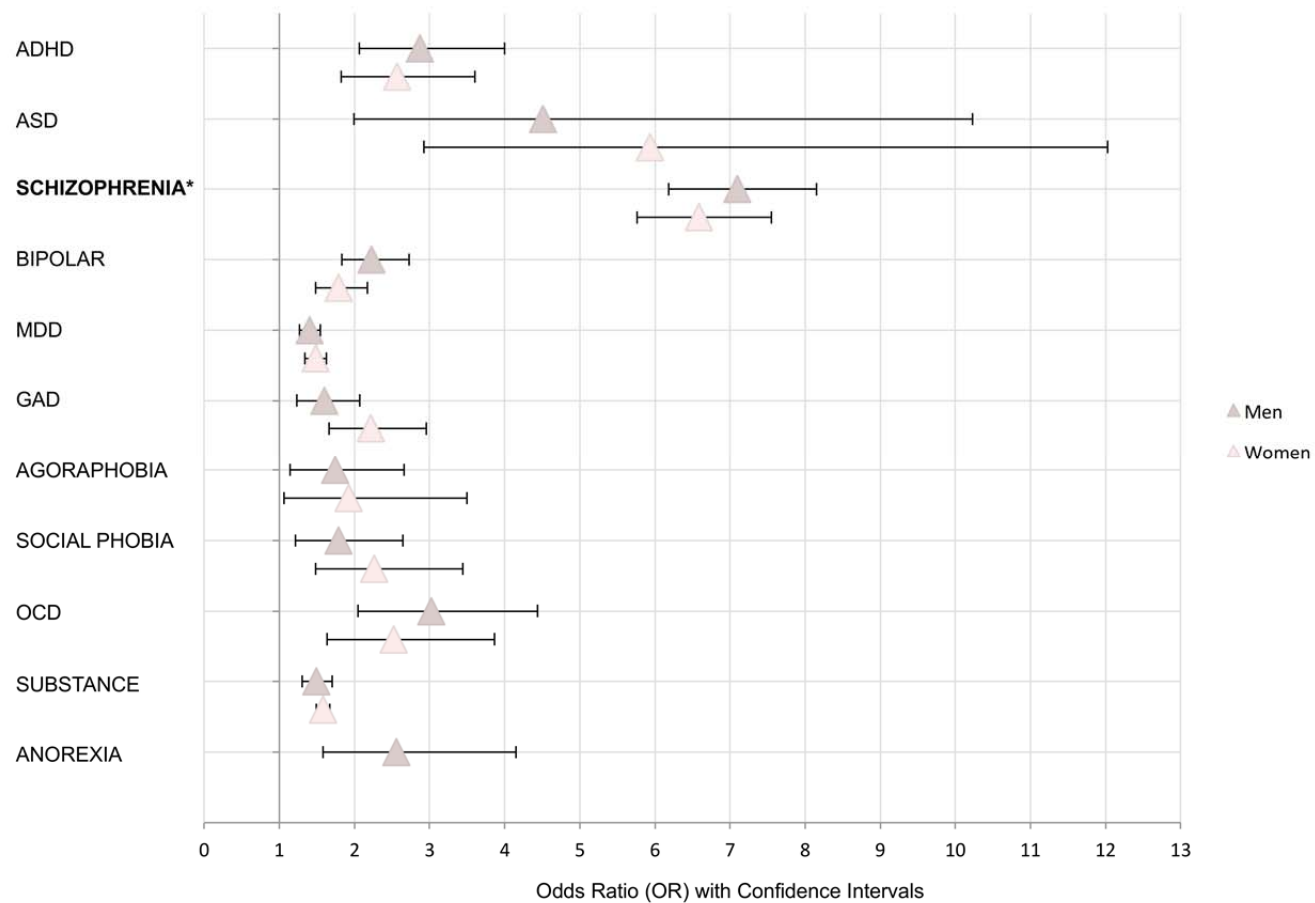

\*\* *Schizophrenia* is the diagnosis of the case indexes, whose gender is reflected in the color of the markers; the value of the markers indicates the risk of that row's diagnosis in the opposite sex mate of the SCZ index (e.g., the odds of ASD in the partners of males with SCZ, relative to their matched controls, is  $\approx 4.5$ ; the odds of ASD in the partners of females with SCZ, relative to their matched controls, is  $\approx 5.9$ )

**eFigure 4. Odds ratios for psychiatric disorders in spouses of BIP probands, restricted case samples**

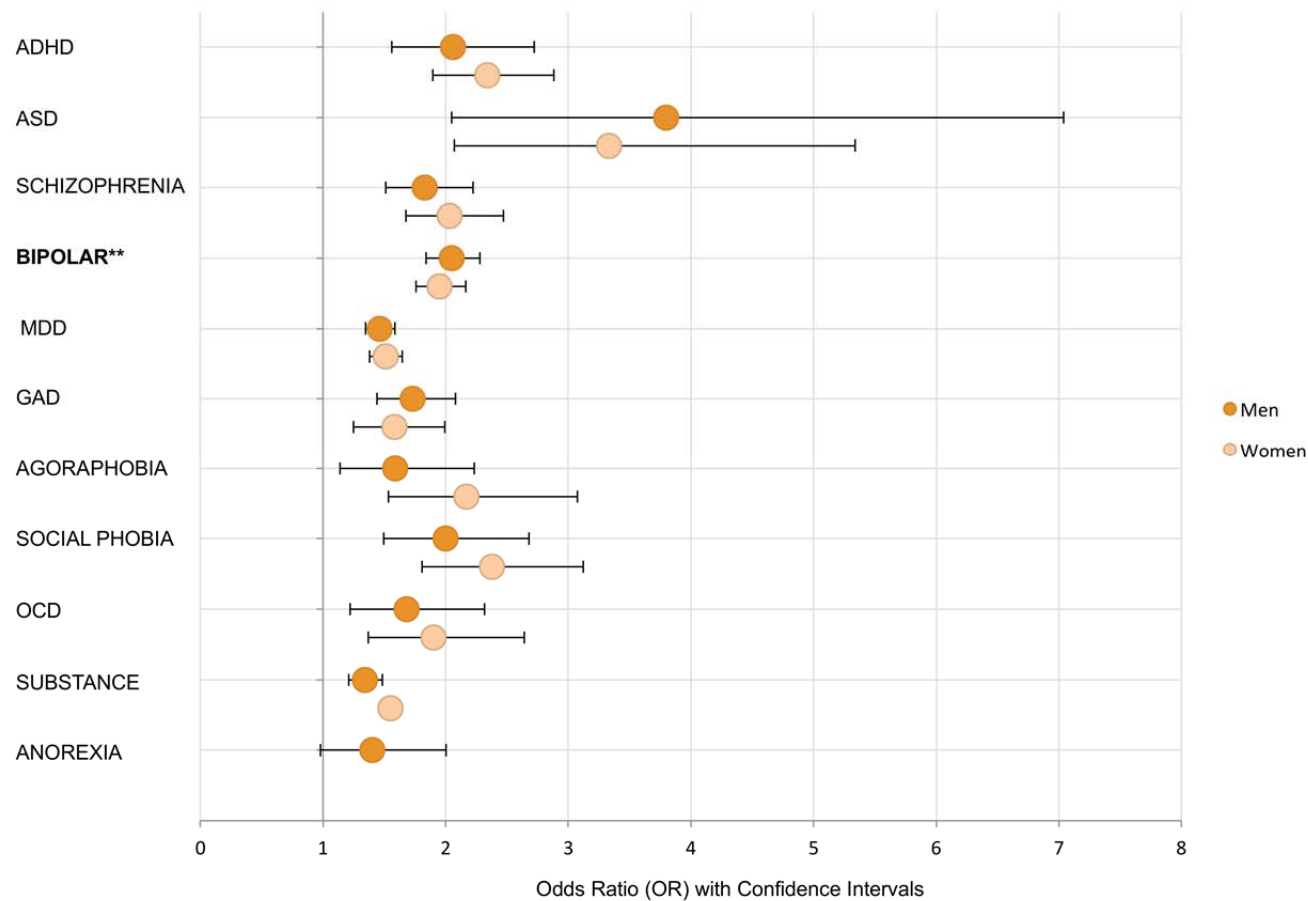

\*\* *Bipolar* is the diagnosis of the case indexes, whose gender is reflected in the color of the markers; the value of the markers indicates the risk of that row's diagnosis in the opposite sex mate of the BIP index (e.g., the odds of ASD in the partners of males with BIP, relative to their matched controls, is  $\approx 3.8$ ; the odds of ASD in the partners of females with BIP, relative to their matched controls, is  $\approx 3.3$ )



**eFigure 5. Odds ratios for psychiatric disorders in spouses of MDD probands, restricted case samples**

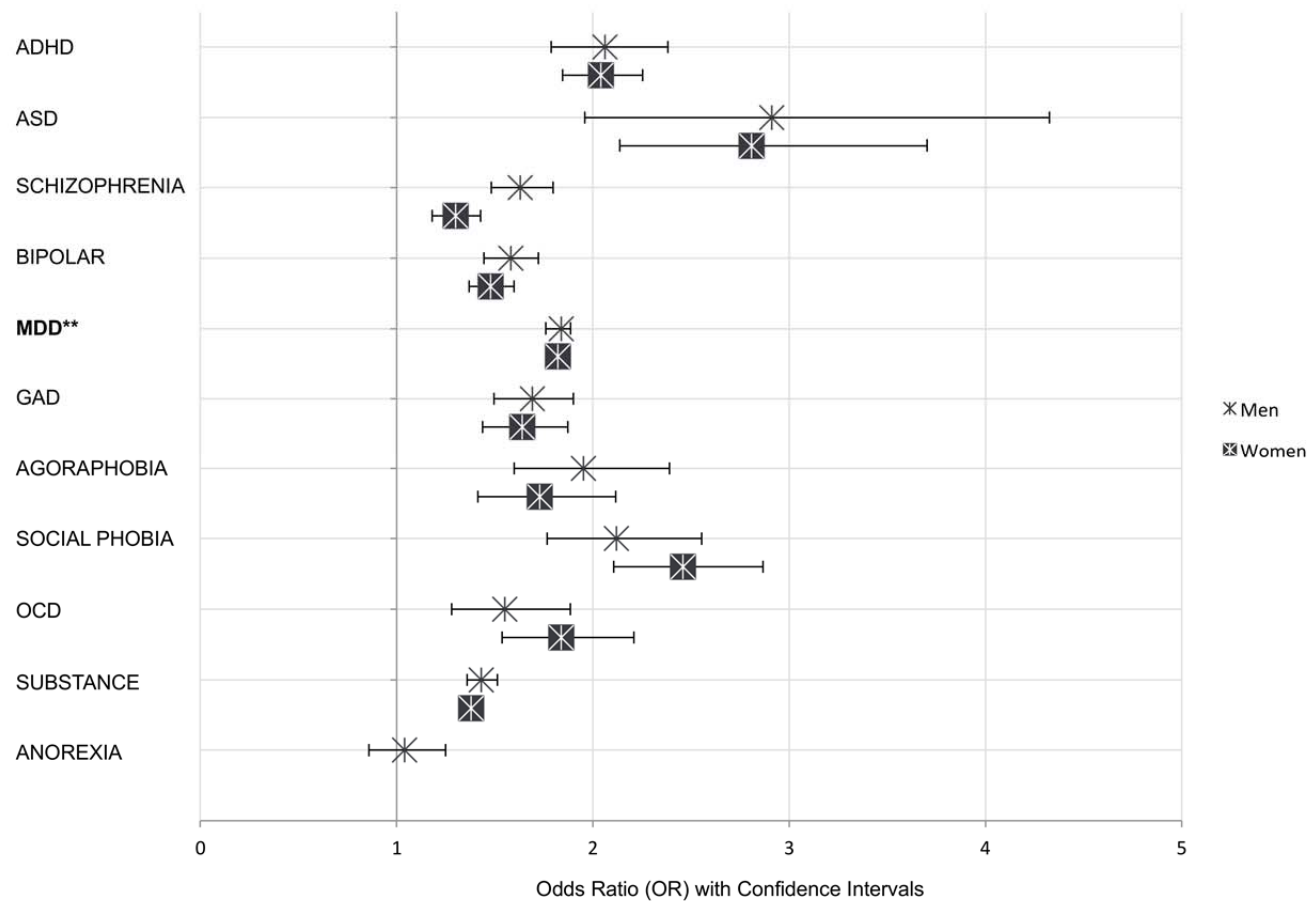

\*\* MDD is the diagnosis of the case indexes, whose gender is reflected in the color of the markers; the value of the markers indicates the risk of that row's diagnosis in the opposite sex mate of the MDD index (e.g., the odds of ASD in the partners of males with MDD, relative to their matched controls, is  $\approx 2.9$ ; the odds of ASD in the partners of females with MDD, relative to their matched controls, is  $\approx 2.8$ )

**Figure 6. Odds ratios for psychiatric disorders in spouses of GAD probands, restricted case samples**

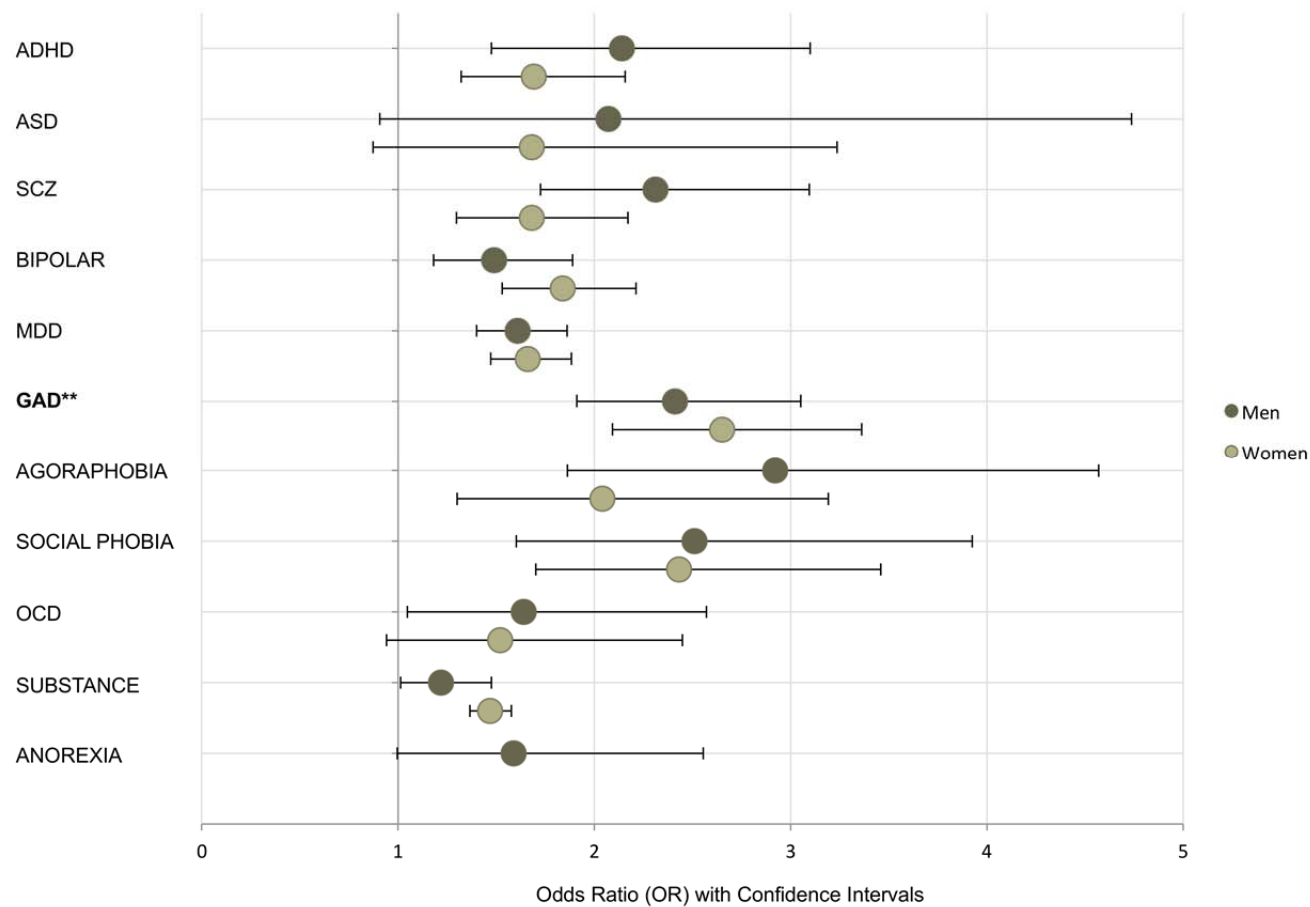

\*\* GAD is the diagnosis of the case indexes, whose gender is reflected in the color of the markers; the value of the markers indicates the risk of that row's diagnosis in the opposite sex mate of the GAD index (e.g., the odds of ASD in the partners of males with GAD, relative to their matched controls, is  $\approx 2.0$ ; the odds of ASD in the partners of females with GAD, relative to their matched controls, is  $\approx 1.7$ )

**Figure 7. Odds ratios for psychiatric disorders in spouses of AGO probands, restricted case samples**

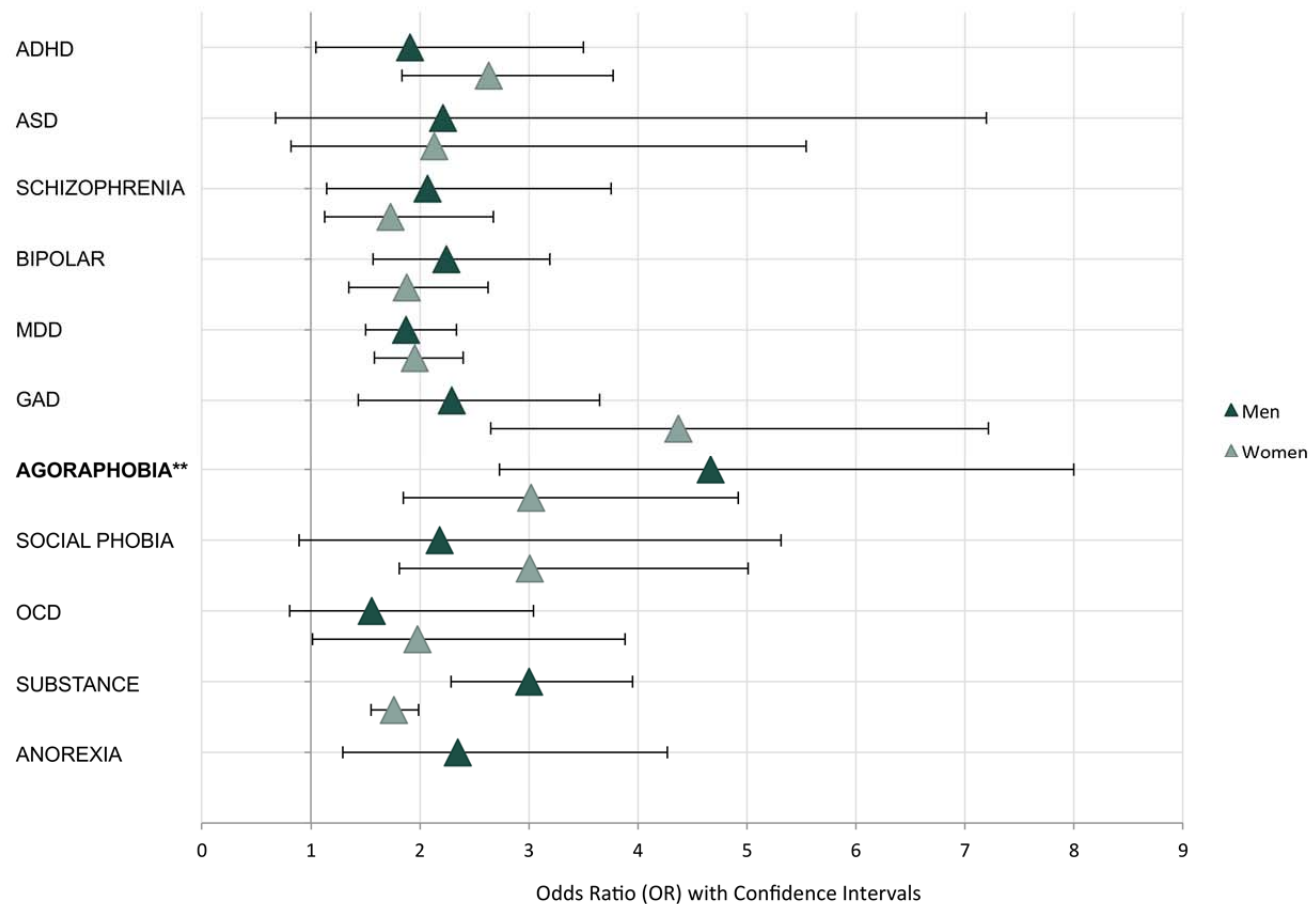

\*\* *Agoraphobia* is the diagnosis of the case indexes, whose gender is reflected in the color of the markers; the value of the markers indicates the risk of that row's diagnosis in the opposite sex mate of the AGO index (e.g., the odds of ASD in the partners of males with AGO, relative to their matched controls, is  $\approx 2.2$ ; the odds of ASD in the partners of females with AGO, relative to their matched controls, is  $\approx 2.1$ )

**eFigure 8. Odds ratios for psychiatric disorders in spouses of SOC probands, restricted case samples**

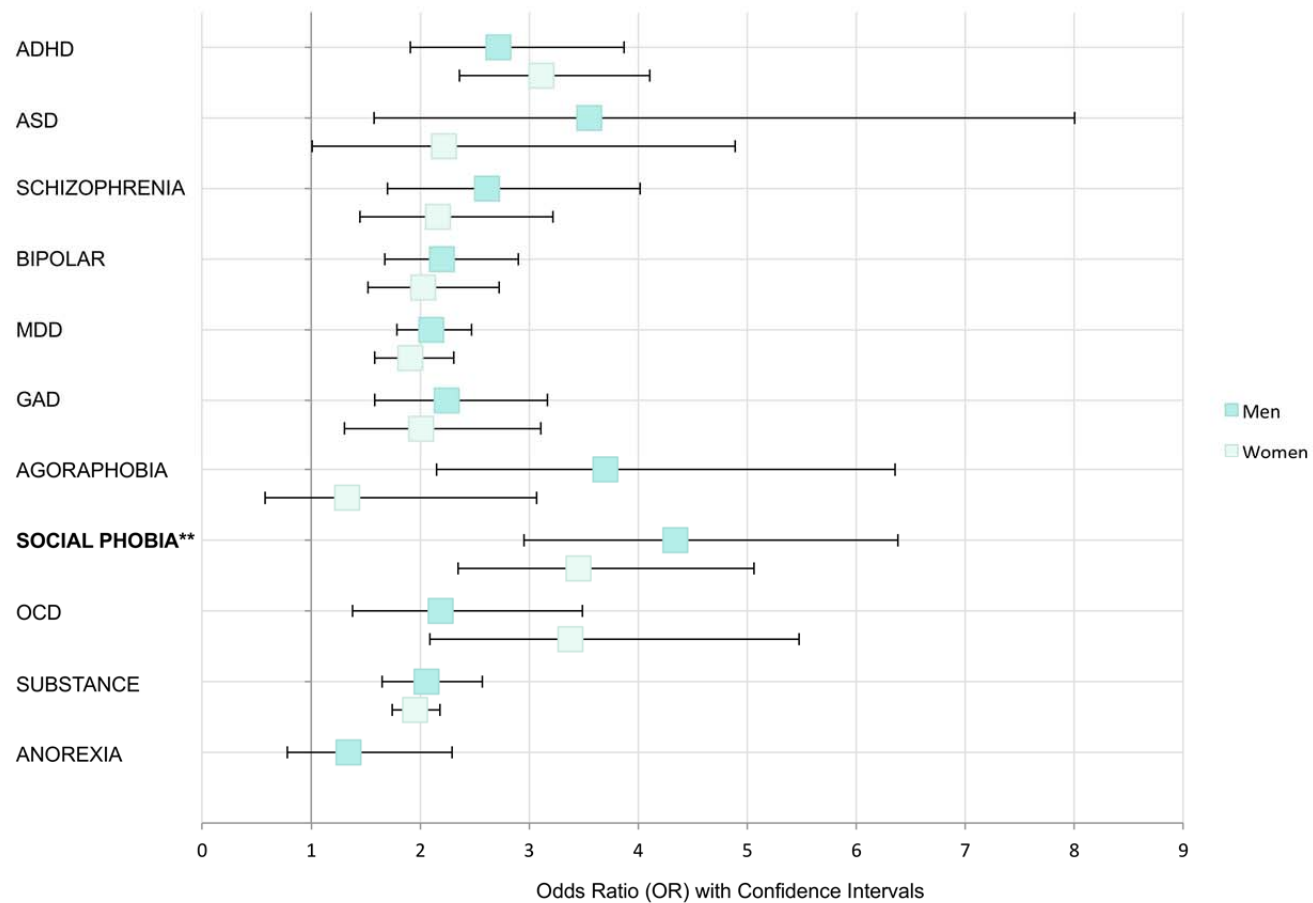

\*\* *Social Phobia* is the diagnosis of the case indexes, whose gender is reflected in the color of the markers; the value of the markers indicates the risk of that row's diagnosis in the opposite sex mate of the SOC index (e.g., the odds of ASD in the partners of males with SOC, relative to their matched controls, is  $\approx 3.6$ ; the odds of ASD in the partners of females with SOC, relative to their matched controls, is  $\approx 2.2$ )

**Figure 9. Odds ratios for psychiatric disorders in spouses of OCD probands, restricted case samples**

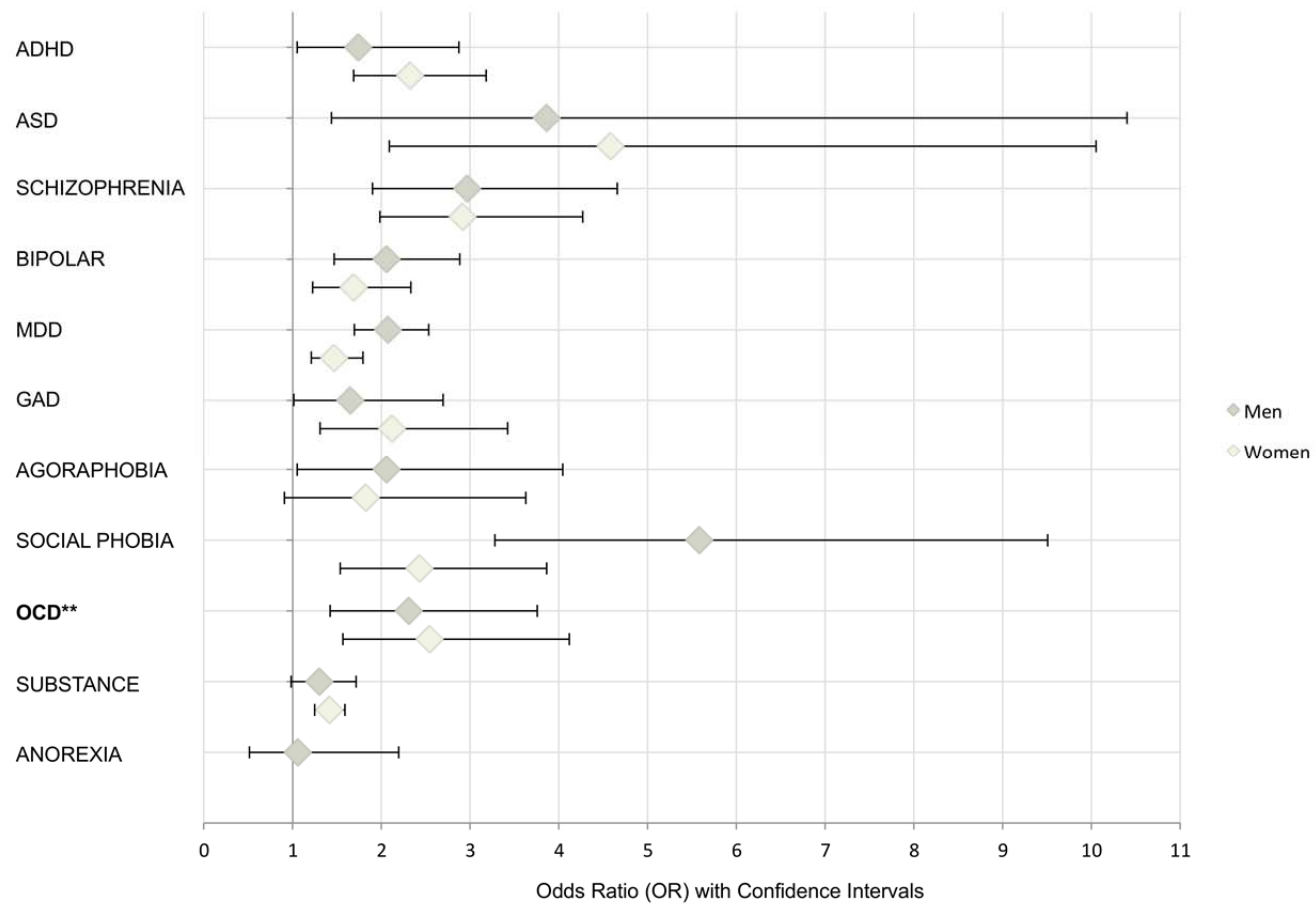

\*\* OCD is the diagnosis of the case indexes, whose gender is reflected in the color of the markers; the value of the markers indicates the risk of that row's diagnosis in the opposite sex mate of the OCD index (e.g., the odds of ASD in the partners of males with OCD, relative to their matched controls, is  $\approx 3.9$ ; the odds of ASD in the partners of females with OCD, relative to their matched controls, is  $\approx 4.6$ )

**eFigure 10. Odds ratios for psychiatric disorders in spouses of SUB probands, restricted case samples**

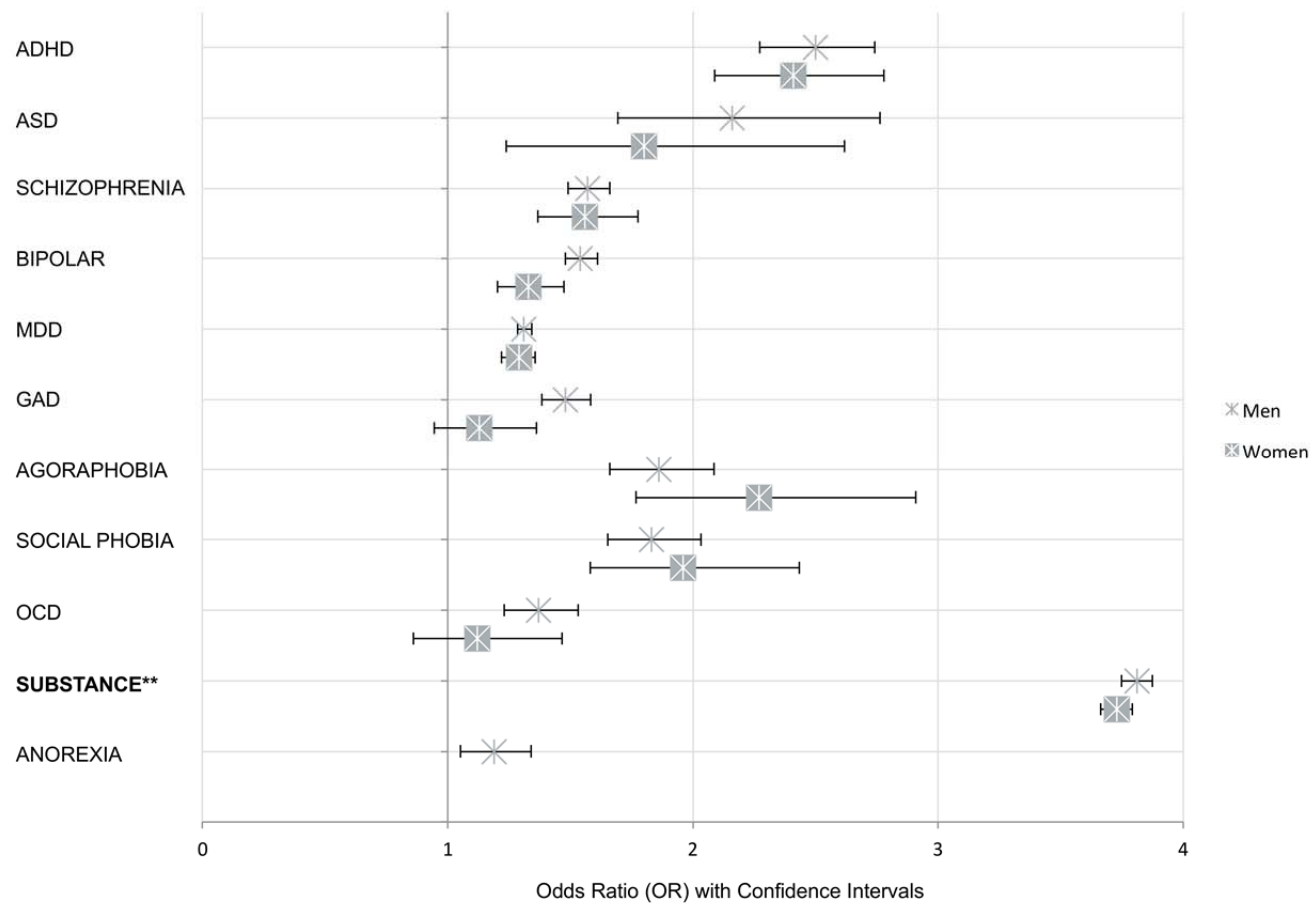

\*\* *Substance Abuse* is the diagnosis of the case indexes, whose gender is reflected in the color of the markers; the value of the markers indicates the risk of that row's diagnosis in the opposite sex mate of the SUB index (e.g., the odds of ASD in the partners of males with SUB, relative to their matched controls, is  $\approx 2.2$ ; the odds of ASD in the partners of females with SUB, relative to their matched controls, is  $\approx 1.8$ )

**eFigure 11. Odds ratios for psychiatric disorders in spouses of ANO probands, restricted case samples**

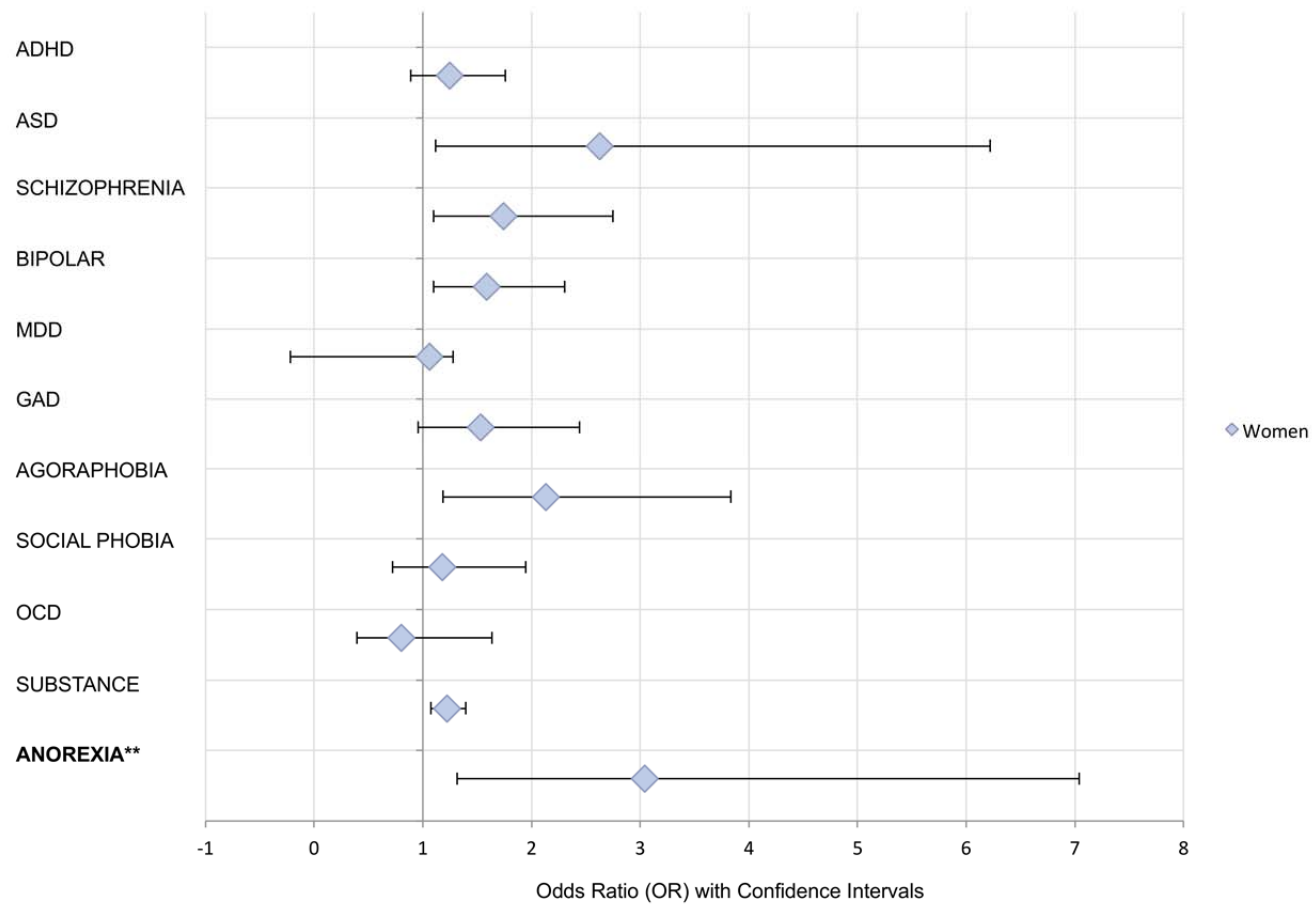

\*\* *Anorexia* is the diagnosis of the case indexes, whose gender is reflected in the color of the markers; the value of the markers indicates the risk of that row's diagnosis in the opposite sex mate of the ANO index (e.g., the odds of ASD in the partners of females with ANO, relative to their matched controls, is  $\approx 2.6$ ; odds in the partners of male indexes are unavailable due to low numbers of mated cases)

**eFigure 12. Dotplot of Odds Ratios in Somatic Proband Populations<sup>1</sup>, By Proband Gender, Restricted Case Samples**

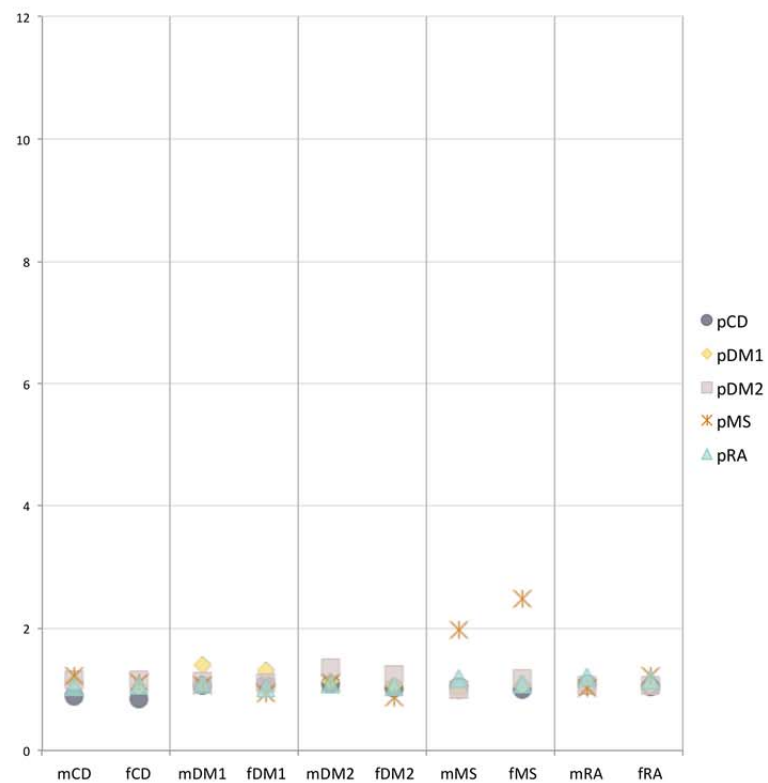

<sup>1</sup>CD = Crohn's Disease, DM1 = Diabetes Mellitus Type I, DM2 = Diabetes Mellitus Type 2, MS = Multiple Sclerosis, RA = Rheumatoid Arthritis ; mXXX = Male proband with XXX; fXXX = Female proband with XXX; pXXX = Opposite sex partner of a proband with XXX
